# Supplementary material for: Application of Laparoscopic Radical Resection for Type III and IV Hilar Cholangiocarcinoma Treatment
Source: Hindawi journal article supplement (doi:10.1155/2020/1506275), 2020-02-25
Supplement: f1 [file 1506275.f1.pdf]

### Supplementary Material

Table S1 Supplementary information of 6 patients undergoing laparoscopic radical resection of hilar cholangiocarcinoma

| case | Median size of tumor | TNM stage | R stage | Atypical hyperplasia | Vascular invasion | knots |
|------|----------------------|-----------|---------|----------------------|-------------------|-------|
| 1    | 2.1cm                | T4N0M0    | IIIB    | N                    | N                 | 4     |
| 2    | 3.6cm                | T2N0M0    | II      | N                    | Y                 | 4     |
| 3    | 1.5cm                | T2N0M0    | II      | N                    | N                 | 4     |
| 4    | 1.7cm                | T2N0M0    | II      | N                    | N                 | 4     |
| 5    | 2.4cm                | T2N0M0    | II      | N                    | N                 | 4     |
| 6    | 2.0cm                | T2N0M0    | II      | Y                    | N                 | 4     |
